# Supplementary material for: Industrial Scale Direct Liquefaction of <em>Eucalyptus</em> Biomass
Source: Preprints.org preprint supplement (doi:10.20944/preprints202308.0563.v1), 2023-08-08
Supplement: Supplementary file 3 [file supplementary]

Supporting Information

Industrial Scale Direct Liquefaction of *Eucalyptus* Biomass

Irina Fernandes2, José Condeço2, Duarte M. Cecilio 1,2, Maria Joana Neiva Correia 2, João Bordado2,3, Margarida Mateus 1,2*

1 Secil S.A., Fábrica Secil – Outão, Setúbal, Portugal.

2 CERENA, Centro de Recursos Naturais e Ambiente, Departamento de Engenharia Química, Instituto Superior Técnico, Universidade de Lisboa, Lisboa, Portugal***** Correspondence: e-mail@e-mail.com; Tel.: (optional; include country code; if there are multiple corresponding a

600

1100

1600

2100

2600

3100

3600

Absorvância

Número de Onda (cm

-

1

)

Xylitol

Xylose

Trehalose

Sorbose

Ribose

Rhamnose

Mannose

HMF

Glucose

Galactose

Furfural

Fructose

Cellobiose

Arabinose

Acid

Succinic

Acid

Lactic

Acid

Levullinic

*S1: FTIR Spectrum of Sugars Standards.*


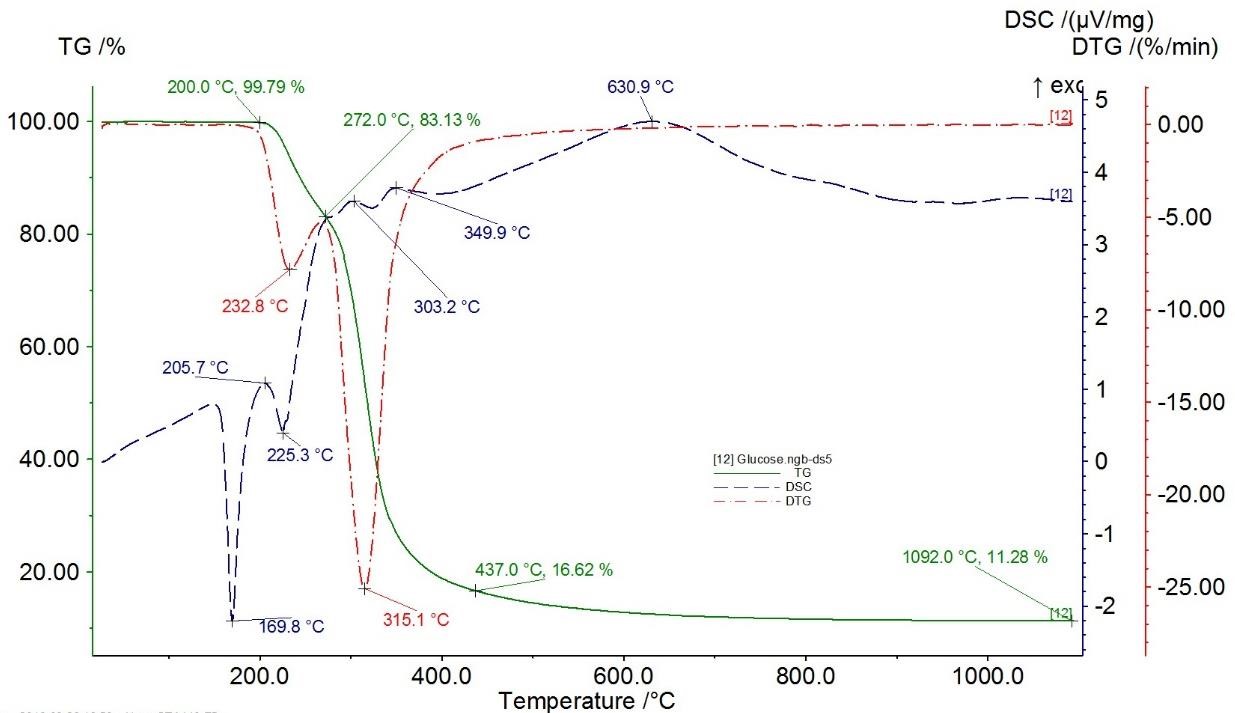


*S2: TG/DTG/DSC of glucose.*


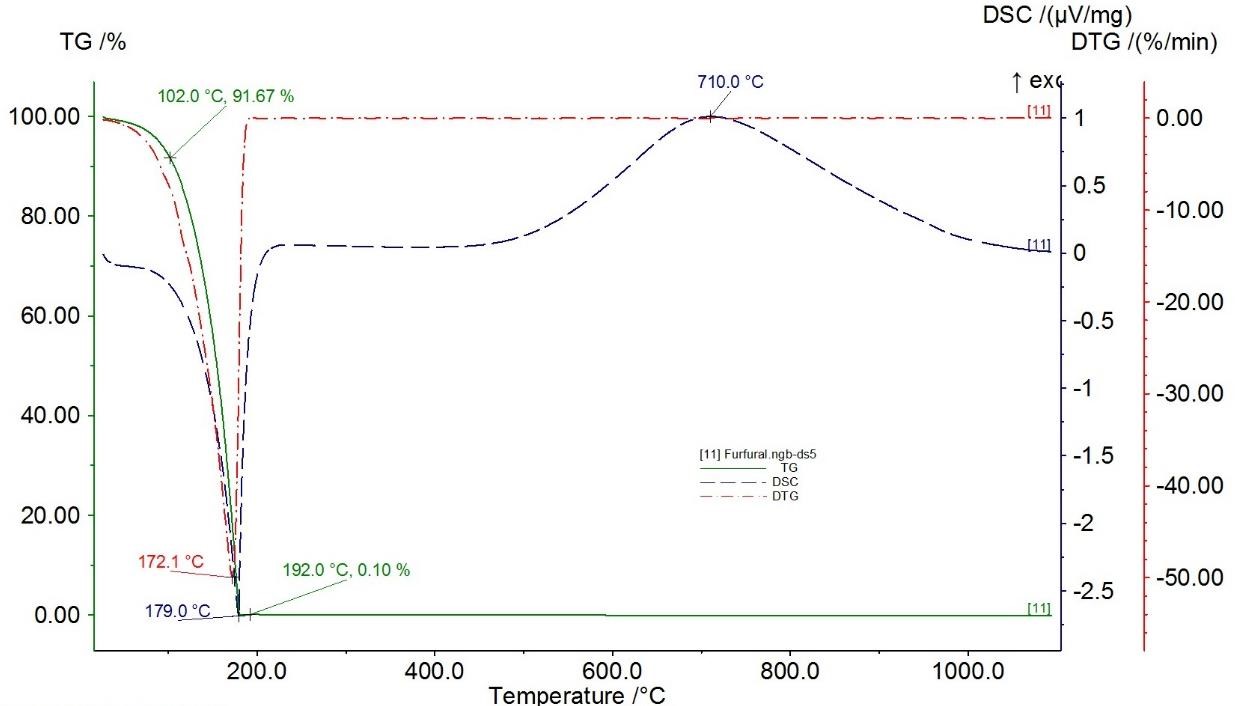


*S3: Curva de TG/DTG/DSC of furfural.*


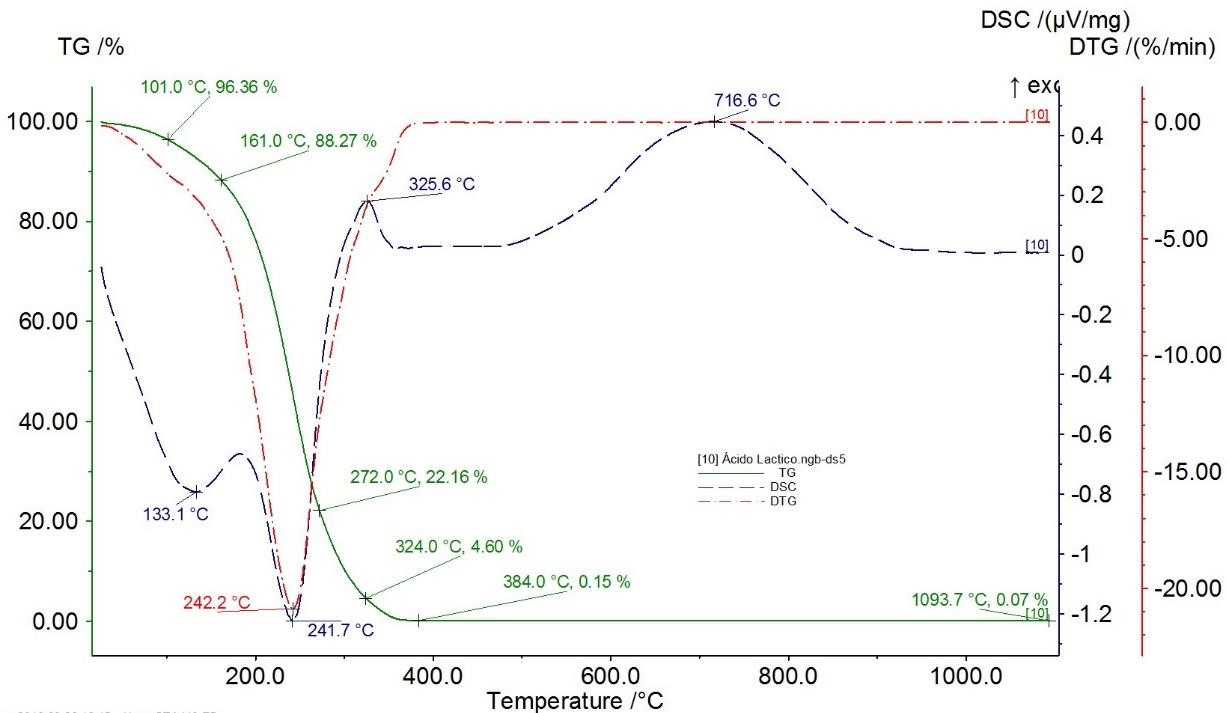


*S4: TG/DTG/DSC of lactic acid.*


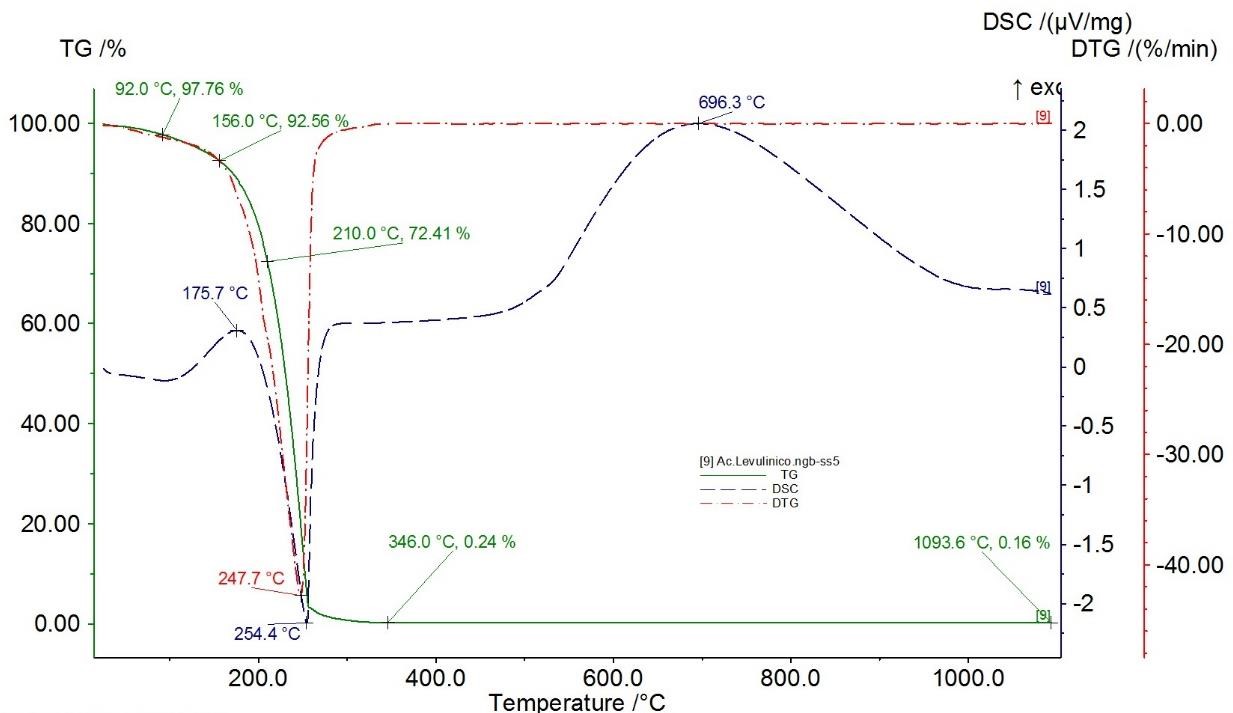


*S5: TG/DTG/DSC of Levullinic acid.*


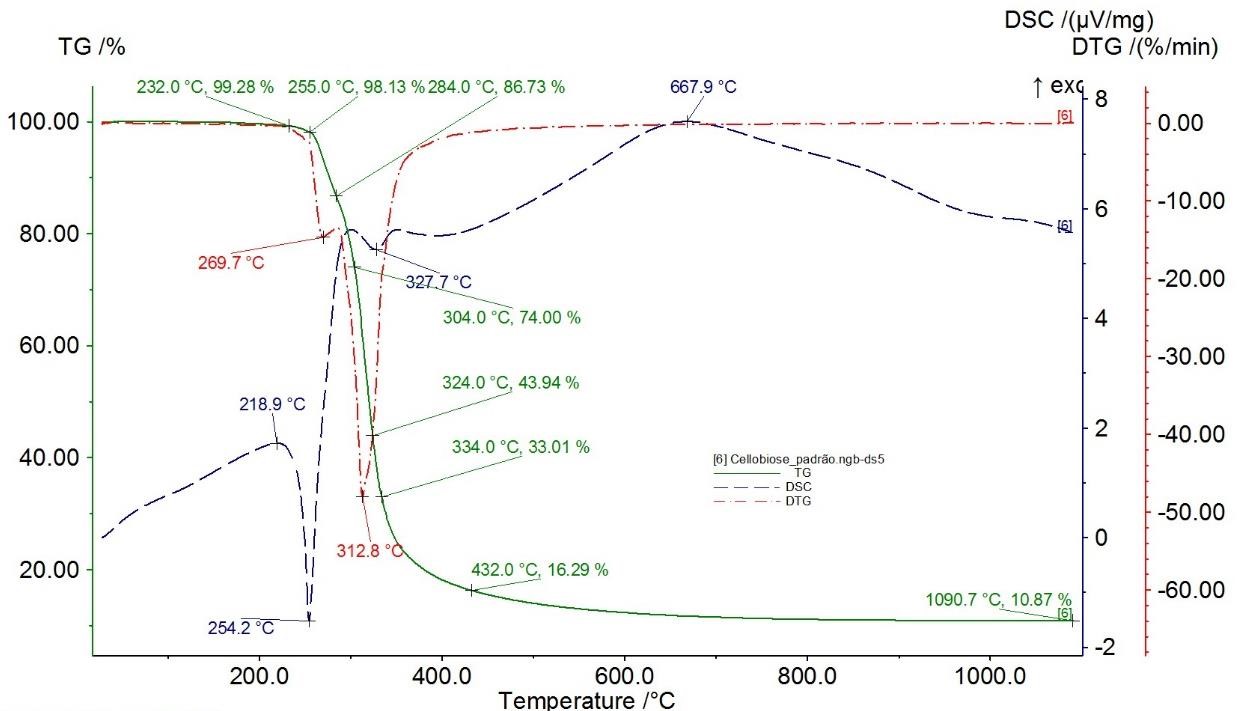


*S6: TG/DTG/DSC of cellobiose.*


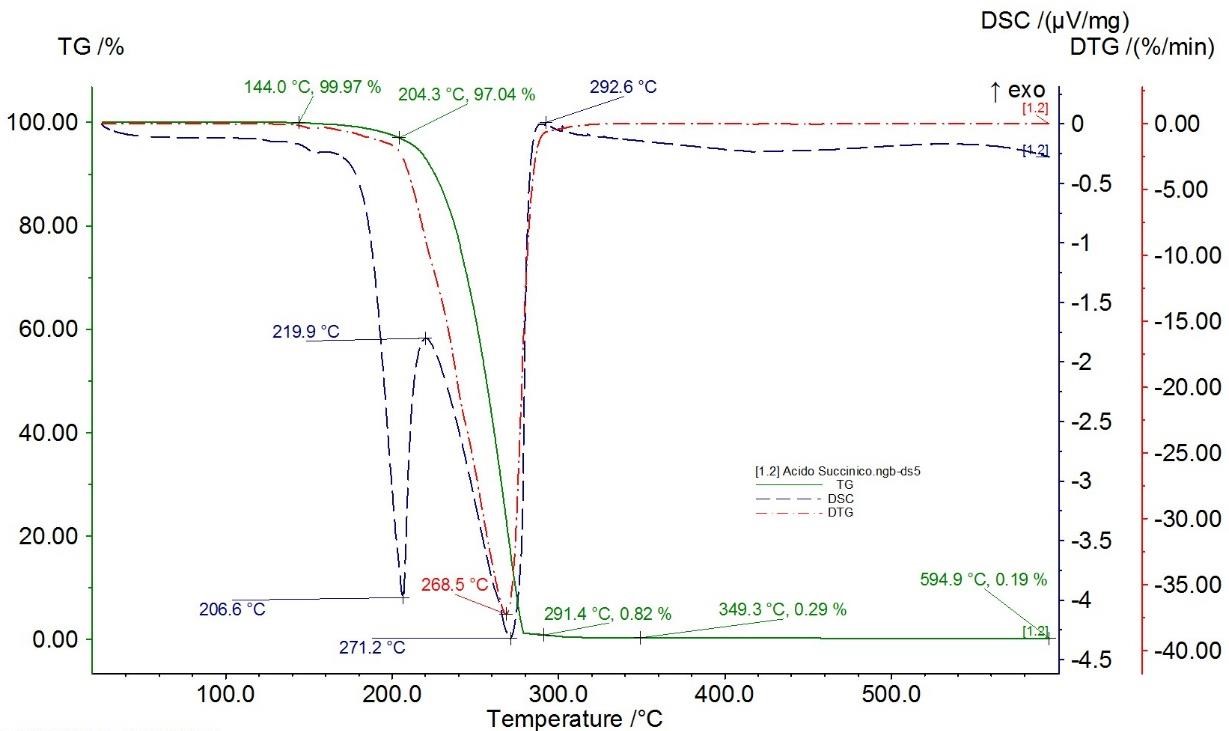


*S7: TG/DTG/DSC of Succinic Acid.*


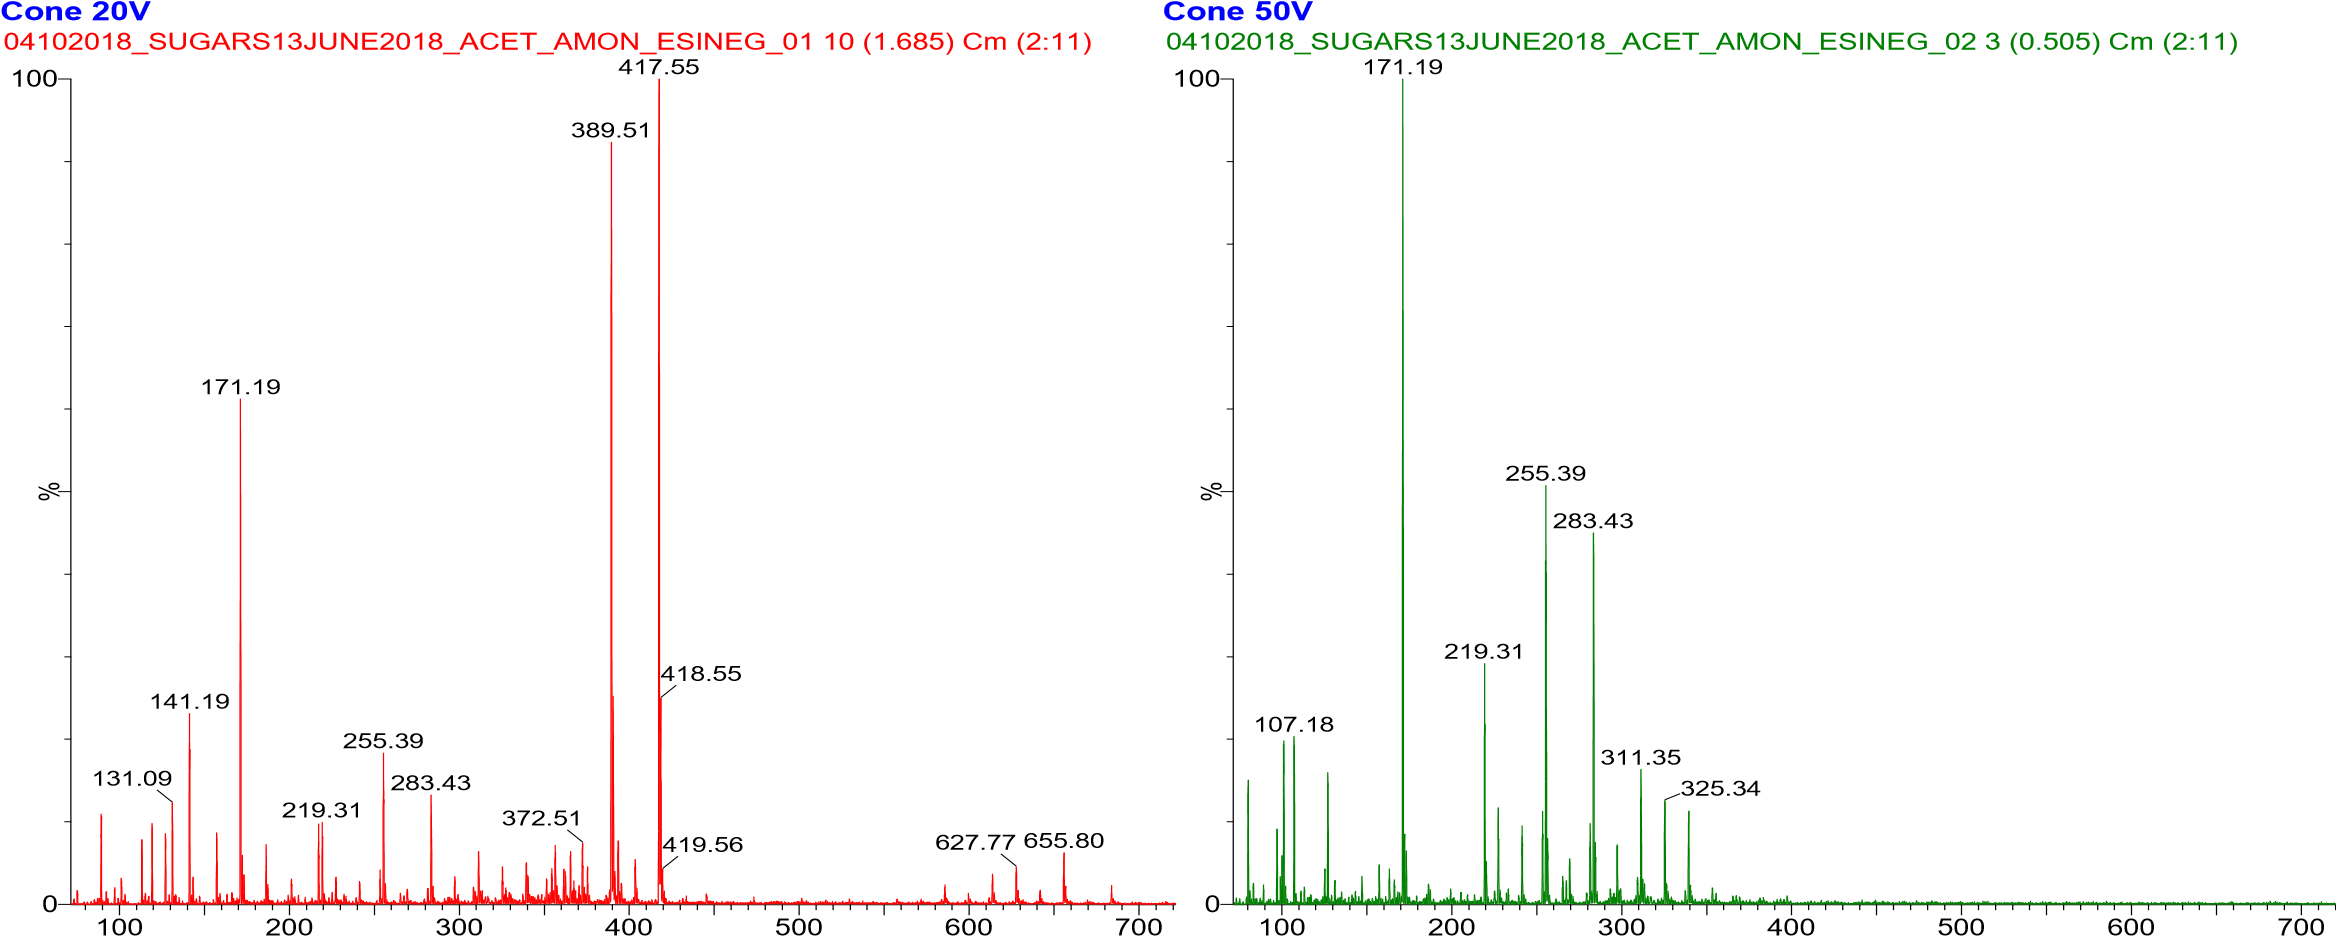


*S8: Mass spectrum of the sugar solution from the third reaction by direct infusion: cone 20V (left) and 50V (right).*


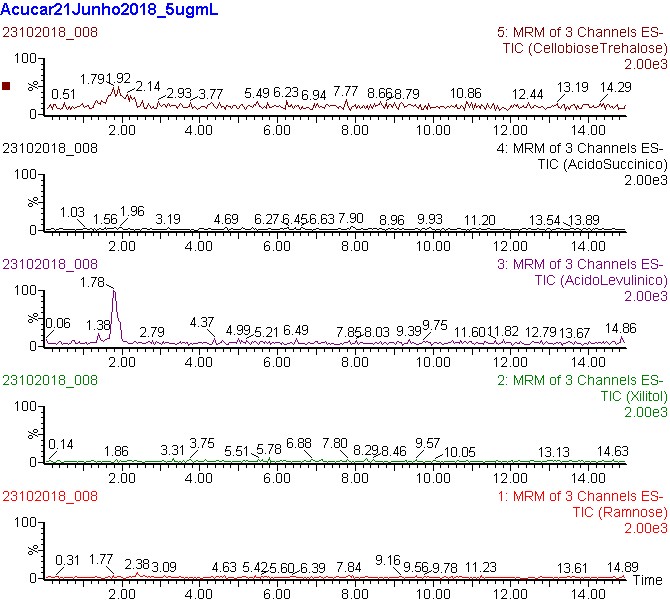

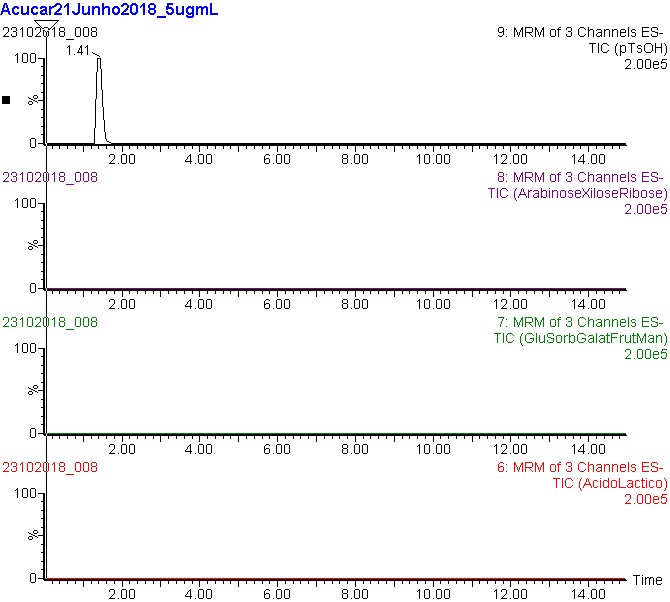


*S9: HPLC Chromatogram for all standards sugars (TIC - Total Ion Count).*
